# Supplementary material
Source: MDPI journal article supplement (https://www.mdpi.com/2226-471X/8/3/207)
Supplement: s1 [file s1]

## Supplementary Materials

**Table S1:** Analysis of the N400 effect at the critical word, with block 1 as reference level (300-500 msec, central electrodes).

| <i>Parameters</i>                                    | <i>Estimate</i> | <i>95% CI</i> | <i>SE</i> | <i>t</i> | <i>p</i> |
|------------------------------------------------------|-----------------|---------------|-----------|----------|----------|
| Intercept                                            | -1.79 ***       | -2.35,-1.23   | 0.29      | -6.24    | <0.001   |
| Plausibility                                         | -0.30           | -0.92,0.31    | 0.31      | -0.96    | 0.337    |
| Third2                                               | 0.52            | -0.09,1.13    | 0.31      | 1.66     | 0.097    |
| Third3                                               | 0.21            | -0.40,0.83    | 0.31      | 0.67     | 0.502    |
| Plaus:Third2                                         | -0.38           | -1.25,0.48    | 0.44      | -0.87    | 0.386    |
| Plaus:Third3                                         | 0.22            | -0.65,1.09    | 0.44      | 0.49     | 0.625    |
| <b>Random Effects</b>                                |                 |               |           |          |          |
| $\sigma^2$                                           | 58.55           |               |           |          |          |
| $\tau_{00}$ ItemNr                                   | 0.88            |               |           |          |          |
| $\tau_{00}$ Subject                                  | 1.07            |               |           |          |          |
| N Subject                                            | 36              |               |           |          |          |
| N ItemNr                                             | 216             |               |           |          |          |
| Observations                                         | 7144            |               |           |          |          |
| Marginal R <sup>2</sup> / Conditional R <sup>2</sup> | 0.001 / 0.033   |               |           |          |          |
| * $p < 0.05$ ** $p < 0.01$ *** $p < 0.001$           |                 |               |           |          |          |

**Table S2:** Analysis of the N400 effect at the critical word, with block 3 as reference level (300-500 msec, central electrodes).

| <i>Parameters</i>                                    | <i>Estimate</i> | <i>95% CI</i> | <i>SE</i> | <i>t</i> | <i>p</i> |
|------------------------------------------------------|-----------------|---------------|-----------|----------|----------|
| Intercept                                            | -1.58 ***       | -2.15,-1.02   | 0.29      | -5.48    | <0.001   |
| Plausibility                                         | -0.08           | -0.70,0.53    | 0.32      | -0.27    | 0.790    |
| Third1                                               | 0.31            | -0.31,0.92    | 0.31      | 0.98     | 0.325    |
| Third2                                               | -0.21           | -0.83,0.40    | 0.31      | -0.67    | 0.502    |
| Plaus:Third1                                         | -0.60           | -1.47,0.27    | 0.44      | -1.35    | 0.176    |
| Plaus:Third2                                         | -0.22           | -1.09,0.65    | 0.44      | -0.49    | 0.625    |
| <b>Random Effects</b>                                |                 |               |           |          |          |
| $\sigma^2$                                           | 58.55           |               |           |          |          |
| $\tau_{00}$ ItemNr                                   | 0.88            |               |           |          |          |
| $\tau_{00}$ Subject                                  | 1.07            |               |           |          |          |
| N <sub>Subject</sub>                                 | 36              |               |           |          |          |
| N <sub>ItemNr</sub>                                  | 216             |               |           |          |          |
| Observations                                         | 7144            |               |           |          |          |
| Marginal R <sup>2</sup> / Conditional R <sup>2</sup> | 0.001 / 0.033   |               |           |          |          |
| * $p<0.05$ ** $p<0.01$ *** $p<0.001$                 |                 |               |           |          |          |

**Table S3:** Exploratory analysis of the N400 effect at the critical word in blocks 1 and 2 using deviation coding (plausible -0.5; implausible 0.5; block 1:-0.5; block 2: 0.5).

| <i>Parameters</i>                                    | <i>Estimate</i> | <i>95% CI</i> | <i>SE</i> | <i>t</i> | <i>p</i> |
|------------------------------------------------------|-----------------|---------------|-----------|----------|----------|
| Intercept                                            | -1.78 ***       | -2.21,-1.36   | 0.22      | -8.22    | <0.001   |
| Plausibility                                         | -0.50 *         | -0.95,-0.04   | 0.23      | -2.14    | 0.032    |
| Block                                                | 0.32            | -0.11,0.76    | 0.22      | 1.47     | 0.143    |
| Plausibility:block                                   | -0.39           | -1.26,0.48    | 0.44      | -0.88    | 0.377    |
| <b>Random Effects</b>                                |                 |               |           |          |          |
| $\sigma^2$                                           | 58.52           |               |           |          |          |
| $\tau_{00}$ ItemNr                                   | 0.89            |               |           |          |          |
| $\tau_{00}$ Subject                                  | 1.10            |               |           |          |          |
| $\tau_{11}$ Subject.PlausImpl_pl                     | 0.18            |               |           |          |          |
| $\rho_{01}$ Subject                                  | 0.03            |               |           |          |          |
| N Subject                                            | 36              |               |           |          |          |
| N ItemNr                                             | 216             |               |           |          |          |
| Observations                                         | 4781            |               |           |          |          |
| Marginal R <sup>2</sup> / Conditional R <sup>2</sup> | 0.002 / 0.035   |               |           |          |          |

\*  $p < 0.05$  \*\*  $p < 0.01$  \*\*\*  $p < 0.001$

**Table S4:** Exploratory analysis of the N400 effect at the critical word in blocks 2 and 3 using deviation coding (plausible -0.5; implausible 0.5; block 2:-0.5; block 3: 0.5).

| <i>Parameters</i>                                    | <i>Estimate</i> | <i>95% CI</i> | <i>SE</i> | <i>t</i> | <i>p</i> |
|------------------------------------------------------|-----------------|---------------|-----------|----------|----------|
| Intercept                                            | -1.62 ***       | -2.03,-1.22   | 0.21      | -7.85    | <0.001   |
| Plausibility                                         | -0.38           | -0.85,0.09    | 0.24      | -1.58    | 0.115    |
| Block                                                | -0.01           | -0.45,0.43    | 0.23      | -0.04    | 0.968    |
| Plausibility:block                                   | 0.60            | -0.28,1.48    | 0.45      | 1.33     | 0.183    |
| <b>Random Effects</b>                                |                 |               |           |          |          |
| $\sigma^2$                                           | 60.38           |               |           |          |          |
| $\tau_{00}$ ItemNr                                   | 0.94            |               |           |          |          |
| $\tau_{00}$ Subject                                  | 0.92            |               |           |          |          |
| $\tau_{11}$ Subject.PlausImpl_pl                     | 0.24            |               |           |          |          |
| $\rho_{01}$ Subject                                  | 0.66            |               |           |          |          |
| N Subject                                            | 36              |               |           |          |          |
| N ItemNr                                             | 216             |               |           |          |          |
| Observations                                         | 4760            |               |           |          |          |
| Marginal R <sup>2</sup> / Conditional R <sup>2</sup> | 0.001 / 0.032   |               |           |          |          |

\*  $p < 0.05$  \*\*  $p < 0.01$  \*\*\*  $p < 0.001$

**Table S5:** Exploratory analysis of the P600 effect at the disambiguating verb in block 2 using a narrower time window (600-800 msec, central-parietal electrodes).

| <i>Parameters</i>                    | <i>Estimate</i> | <i>95% CI</i> | <i>SE</i> | <i>t</i> | <i>p</i> |
|--------------------------------------|-----------------|---------------|-----------|----------|----------|
| Intercept                            | 2.55 ***        | 1.80,3.29     | 0.38      | 6.68     | <0.001   |
| Plausibility                         | -0.57           | -1.23,0.08    | 0.33      | -1.73    | 0.084    |
| TrialPosition                        | -0.01           | -0.04,0.02    | 0.01      | -0.82    | 0.413    |
| Plausibility:TrialPosition           | 0.01            | -0.03,0.04    | 0.02      | 0.44     | 0.661    |
| <b>Random Effects</b>                |                 |               |           |          |          |
| $\sigma^2$                           | 64.43           |               |           |          |          |
| $\tau_{00}$ ItemNr                   | 3.88            |               |           |          |          |
| $\tau_{00}$ Subject                  | 2.60            |               |           |          |          |
| $N$ Subject                          | 36              |               |           |          |          |
| $N$ ItemNr                           | 216             |               |           |          |          |
| Observations                         | 2337            |               |           |          |          |
| Marginal $R^2$ / Conditional $R^2$   | 0.002 / 0.093   |               |           |          |          |
| * $p<0.05$ ** $p<0.01$ *** $p<0.001$ |                 |               |           |          |          |

**Table S6:** Analysis of the N400 effect as a function of trial position at the critical noun in block 1 (300-500 msec, central electrodes).

| <i>Parameters</i>                                    | <i>Estimate</i> | <i>95% CI</i> | <i>SE</i> | <i>t</i> | <i>p</i> |
|------------------------------------------------------|-----------------|---------------|-----------|----------|----------|
| Intercept                                            | -1.79 ***       | -2.37,-1.22   | 0.29      | -6.16    | <0.001   |
| Plausibility                                         | -0.29           | -0.89,0.30    | 0.30      | -0.96    | 0.336    |
| TrialPosition                                        | 0.02            | -0.00,0.04    | 0.01      | 1.61     | 0.107    |
| Plaus:TrialPosition                                  | -0.01           | -0.04,0.02    | 0.02      | -0.49    | 0.621    |
| <b>Random Effects</b>                                |                 |               |           |          |          |
| $\sigma^2$                                           | 54.82           |               |           |          |          |
| $\tau_{00}$ ItemNr                                   | 0.68            |               |           |          |          |
| $\tau_{00}$ Subject                                  | 1.30            |               |           |          |          |
| N <sub>Subject</sub>                                 | 36              |               |           |          |          |
| N <sub>ItemNr</sub>                                  | 216             |               |           |          |          |
| Observations                                         | 2384            |               |           |          |          |
| Marginal R <sup>2</sup> / Conditional R <sup>2</sup> | 0.002 / 0.037   |               |           |          |          |
| * $p<0.05$ ** $p<0.01$ *** $p<0.001$                 |                 |               |           |          |          |

**Table S7:** Analysis of the P600 effect as a function of trial position at the critical noun in block 1 (500-900 msec, central-parietal electrodes).

| <i>Parameters</i>                    | <i>Estimate</i> | <i>95% CI</i> | <i>SE</i> | <i>t</i> | <i>p</i> |
|--------------------------------------|-----------------|---------------|-----------|----------|----------|
| Intercept                            | 0.52            | -0.02,1.05    | 0.27      | 1.89     | 0.060    |
| Plausibility                         | 0.08            | -0.51,0.67    | 0.30      | 0.26     | 0.798    |
| TrialPosition                        | 0.03 **         | 0.01,0.05     | 0.01      | 2.63     | 0.009    |
| Plaus:TrialPosition                  | -0.02           | -0.05,0.01    | 0.02      | -1.50    | 0.134    |
| <b>Random Effects</b>                |                 |               |           |          |          |
| $\sigma^2$                           | 53.74           |               |           |          |          |
| $\tau_{00}$ ItemNr                   | 0.77            |               |           |          |          |
| $\tau_{00}$ Subject                  | 0.96            |               |           |          |          |
| $N$ Subject                          | 36              |               |           |          |          |
| $N$ ItemNr                           | 216             |               |           |          |          |
| Observations                         | 2384            |               |           |          |          |
| Marginal $R^2$ / Conditional $R^2$   | 0.003 / 0.034   |               |           |          |          |
| * $p<0.05$ ** $p<0.01$ *** $p<0.001$ |                 |               |           |          |          |

**Table S8:** Analysis of the N400 effect as a function of trial position at the critical noun in block 2 (300-500 msec, central electrodes).

| <i>Parameters</i>                    | <i>Estimate</i> | <i>95% CI</i> | <i>SE</i> | <i>t</i> | <i>p</i> |
|--------------------------------------|-----------------|---------------|-----------|----------|----------|
| Intercept                            | -1.28 ***       | -1.84,-0.71   | 0.29      | -4.41    | <0.001   |
| Plausibility                         | -0.69 *         | -1.32,-0.06   | 0.32      | -2.14    | 0.032    |
| TrialPosition                        | 0.00            | -0.02,0.03    | 0.01      | 0.22     | 0.824    |
| Plaus:TrialPosition                  | 0.00            | -0.03,0.03    | 0.02      | 0.15     | 0.885    |
| <b>Random Effects</b>                |                 |               |           |          |          |
| $\sigma^2$                           | 61.81           |               |           |          |          |
| $\tau_{00}$ ItemNr                   | 1.57            |               |           |          |          |
| $\tau_{00}$ Subject                  | 0.90            |               |           |          |          |
| $N$ Subject                          | 36              |               |           |          |          |
| $N$ ItemNr                           | 216             |               |           |          |          |
| Observations                         | 2397            |               |           |          |          |
| Marginal $R^2$ / Conditional $R^2$   | 0.002 / 0.040   |               |           |          |          |
| * $p<0.05$ ** $p<0.01$ *** $p<0.001$ |                 |               |           |          |          |



**Table S9:** Analysis of the P600 effect as a function of trial position at the critical noun in block 2 (500-900 msec, central-parietal electrodes).

| <i>Parameters</i>   | <i>Estimate</i> | <i>95% CI</i> | <i>SE</i> | <i>t</i> | <i>p</i> |
|---------------------|-----------------|---------------|-----------|----------|----------|
| Intercept           | 1.10 ***        | 0.61,1.58     | 0.25      | 4.43     | <0.001   |
| Plausibility        | -0.29           | -0.88,0.31    | 0.30      | -0.95    | 0.344    |
| TrialPosition       | -0.01           | -0.03,0.01    | 0.01      | -1.12    | 0.264    |
| Plaus:TrialPosition | 0.02            | -0.01,0.05    | 0.02      | 1.50     | 0.134    |

#### Random Effects

|                                    |               |
|------------------------------------|---------------|
| $\sigma^2$                         | 54.44         |
| $\tau_{00}$ ItemNr                 | 0.63          |
| $\tau_{00}$ Subject                | 0.46          |
| $N$ Subject                        | 36            |
| $N$ ItemNr                         | 216           |
| Observations                       | 2397          |
| Marginal $R^2$ / Conditional $R^2$ | 0.001 / 0.021 |

\*  $p < 0.05$  \*\*  $p < 0.01$  \*\*\*  $p < 0.001$

**Table S10:** Analysis of the N400 effect as a function of trial position at the critical noun in block 3 (300-500 msec, central electrodes).

| <i>Parameters</i>                                    | <i>Estimate</i> | <i>95% CI</i> | <i>SE</i> | <i>t</i> | <i>p</i> |
|------------------------------------------------------|-----------------|---------------|-----------|----------|----------|
| Intercept                                            | -1.58 ***       | -2.10,-1.05   | 0.27      | -5.88    | <0.001   |
| Plausibility                                         | -0.10           | -0.72,0.52    | 0.32      | -0.33    | 0.744    |
| TrialPosition                                        | 0.02 *          | 0.00,0.05     | 0.01      | 2.05     | 0.040    |
| Plaus:TrialPosition                                  | -0.01           | -0.04,0.02    | 0.02      | -0.74    | 0.459    |
| <b>Random Effects</b>                                |                 |               |           |          |          |
| $\sigma^2$                                           | 58.99           |               |           |          |          |
| $\tau_{00}$ ItemNr                                   | 0.57            |               |           |          |          |
| $\tau_{00}$ Subject                                  | 0.69            |               |           |          |          |
| N Subject                                            | 36              |               |           |          |          |
| N ItemNr                                             | 216             |               |           |          |          |
| Observations                                         | 2363            |               |           |          |          |
| Marginal R <sup>2</sup> / Conditional R <sup>2</sup> | 0.002 / 0.023   |               |           |          |          |

\*  $p < 0.05$  \*\*  $p < 0.01$  \*\*\*  $p < 0.001$

**Table S11:** Analysis of the P600 effect as a function of trial position at the critical noun in block 3 (500-900 msec, central-parietal electrodes).

| <i>Parameters</i>                    | <i>Estimate</i> | <i>95% CI</i> | <i>SE</i> | <i>t</i> | <i>p</i> |
|--------------------------------------|-----------------|---------------|-----------|----------|----------|
| Intercept                            | 1.00 ***        | 0.47,1.53     | 0.27      | 3.71     | <0.001   |
| Plausibility                         | -0.32           | -0.92,0.28    | 0.31      | -1.06    | 0.291    |
| TrialPosition                        | 0.01            | -0.01,0.03    | 0.01      | 0.64     | 0.525    |
| Plaus:TrialPosition                  | -0.01           | -0.04,0.02    | 0.02      | -0.52    | 0.600    |
| <b>Random Effects</b>                |                 |               |           |          |          |
| $\sigma^2$                           | 55.26           |               |           |          |          |
| $\tau_{00}$ ItemNr                   | 0.47            |               |           |          |          |
| $\tau_{00}$ Subject                  | 0.86            |               |           |          |          |
| $N$ Subject                          | 36              |               |           |          |          |
| $N$ ItemNr                           | 216             |               |           |          |          |
| Observations                         | 2363            |               |           |          |          |
| Marginal $R^2$ / Conditional $R^2$   | 0.001 / 0.024   |               |           |          |          |
| * $p<0.05$ ** $p<0.01$ *** $p<0.001$ |                 |               |           |          |          |

**Table S12:** Analysis of the N400 effect as a function of trial position at the sentence-final word in block 3 (300-500 msec, central electrodes).

| <i>Parameters</i>                    | <i>Estimate</i> | <i>95% CI</i> | <i>SE</i> | <i>t</i> | <i>p</i> |
|--------------------------------------|-----------------|---------------|-----------|----------|----------|
| Intercept                            | 1.33 ***        | 0.59,2.07     | 0.38      | 3.53     | <0.001   |
| Plausibility                         | -0.32           | -0.98,0.34    | 0.34      | -0.95    | 0.345    |
| TrialPosition                        | -0.02           | -0.05,0.00    | 0.01      | -1.95    | 0.051    |
| Plaus:TrialPosition                  | 0.01            | -0.02,0.04    | 0.02      | 0.62     | 0.532    |
| <b>Random Effects</b>                |                 |               |           |          |          |
| $\sigma^2$                           | 66.47           |               |           |          |          |
| $\tau_{00}$ ItemNr                   | 2.16            |               |           |          |          |
| $\tau_{00}$ Subject                  | 2.74            |               |           |          |          |
| $N$ Subject                          | 36              |               |           |          |          |
| $N$ ItemNr                           | 216             |               |           |          |          |
| Observations                         | 2354            |               |           |          |          |
| Marginal $R^2$ / Conditional $R^2$   | 0.003 / 0.071   |               |           |          |          |
| * $p<0.05$ ** $p<0.01$ *** $p<0.001$ |                 |               |           |          |          |

**Table S13:** Analysis of the P600 effect as a function of trial position at the sentence-final word in block 3 (500-900 msec, central-parietal electrodes).

| <i>Parameters</i>                    | <i>Estimate</i> | <i>95% CI</i> | <i>SE</i> | <i>t</i> | <i>p</i> |
|--------------------------------------|-----------------|---------------|-----------|----------|----------|
| Intercept                            | 1.33 ***        | 0.59,2.07     | 0.38      | 3.53     | <0.001   |
| Plausibility                         | -0.32           | -0.98,0.34    | 0.34      | -0.95    | 0.345    |
| TrialPosition                        | -0.02           | -0.05,0.00    | 0.01      | -1.95    | 0.051    |
| Plaus:TrialPosition                  | 0.01            | -0.02,0.04    | 0.02      | 0.62     | 0.532    |
| <b>Random Effects</b>                |                 |               |           |          |          |
| $\sigma^2$                           | 66.47           |               |           |          |          |
| $\tau_{00}$ ItemNr                   | 2.16            |               |           |          |          |
| $\tau_{00}$ Subject                  | 2.74            |               |           |          |          |
| $N$ Subject                          | 36              |               |           |          |          |
| $N$ ItemNr                           | 216             |               |           |          |          |
| Observations                         | 2354            |               |           |          |          |
| Marginal $R^2$ / Conditional $R^2$   | 0.003 / 0.071   |               |           |          |          |
| * $p<0.05$ ** $p<0.01$ *** $p<0.001$ |                 |               |           |          |          |
